# Supplementary material
Source: Elsevier journal article supplement (https://comptes-rendus.academie-sciences.fr/geoscience/article/10.1016/j.crte.2015.12.003/file/attach/mmc8.pdf)
Supplement: mmc8 [file mmc8.pdf]

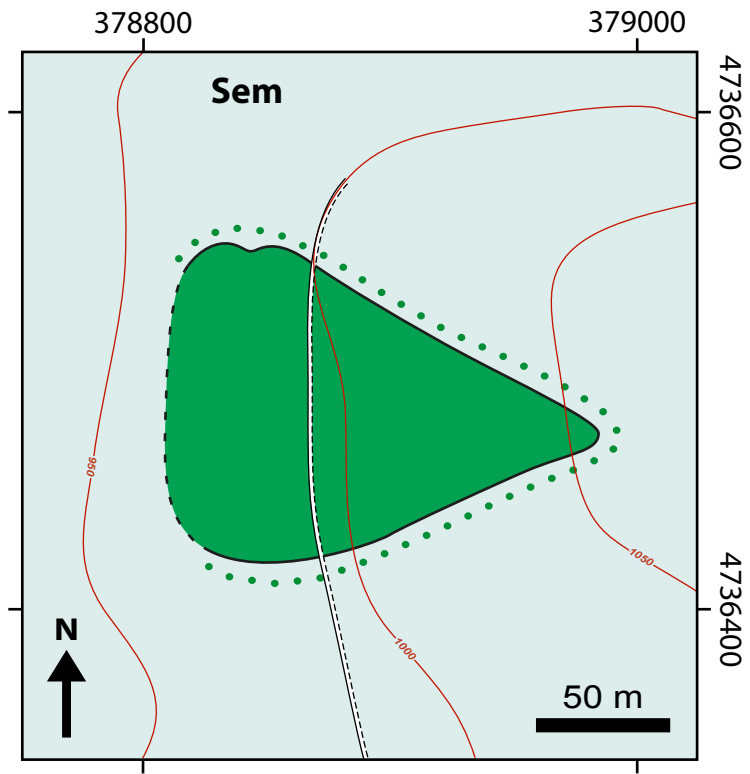

St Blanquat et al., Figure SM 7
